# Supplementary material
Source: Springer Nature journal article supplement (https://www.springermedizin.de/resource/supplementary/12936_2011_1929_MOESM5_ESM.pdf/9542078)

# Activities and Responsibilities

REPORTING →

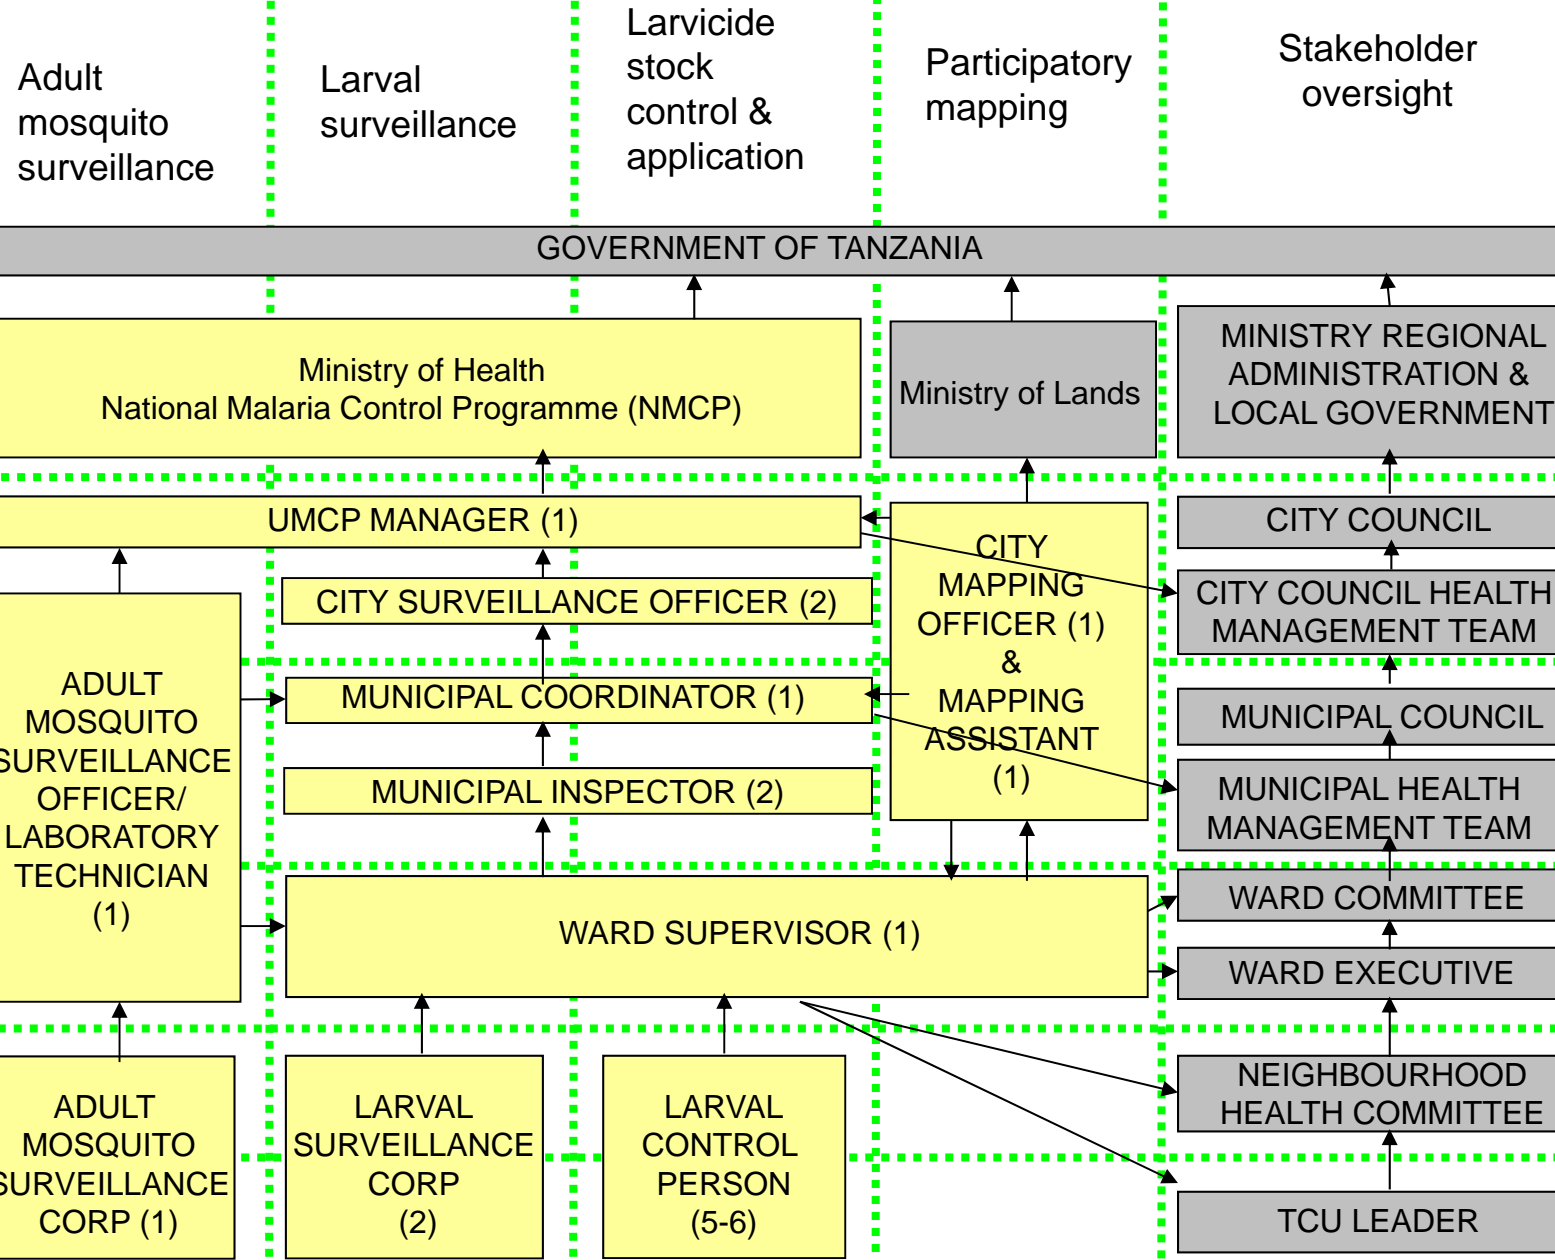

Supplement: MOESM5 [file 9542078]
